# Supplementary material
Source: MDPI journal article supplement (https://www.mdpi.com/2073-4395/13/6/1441)

Supplementary figure S1

GO Enrichment top50

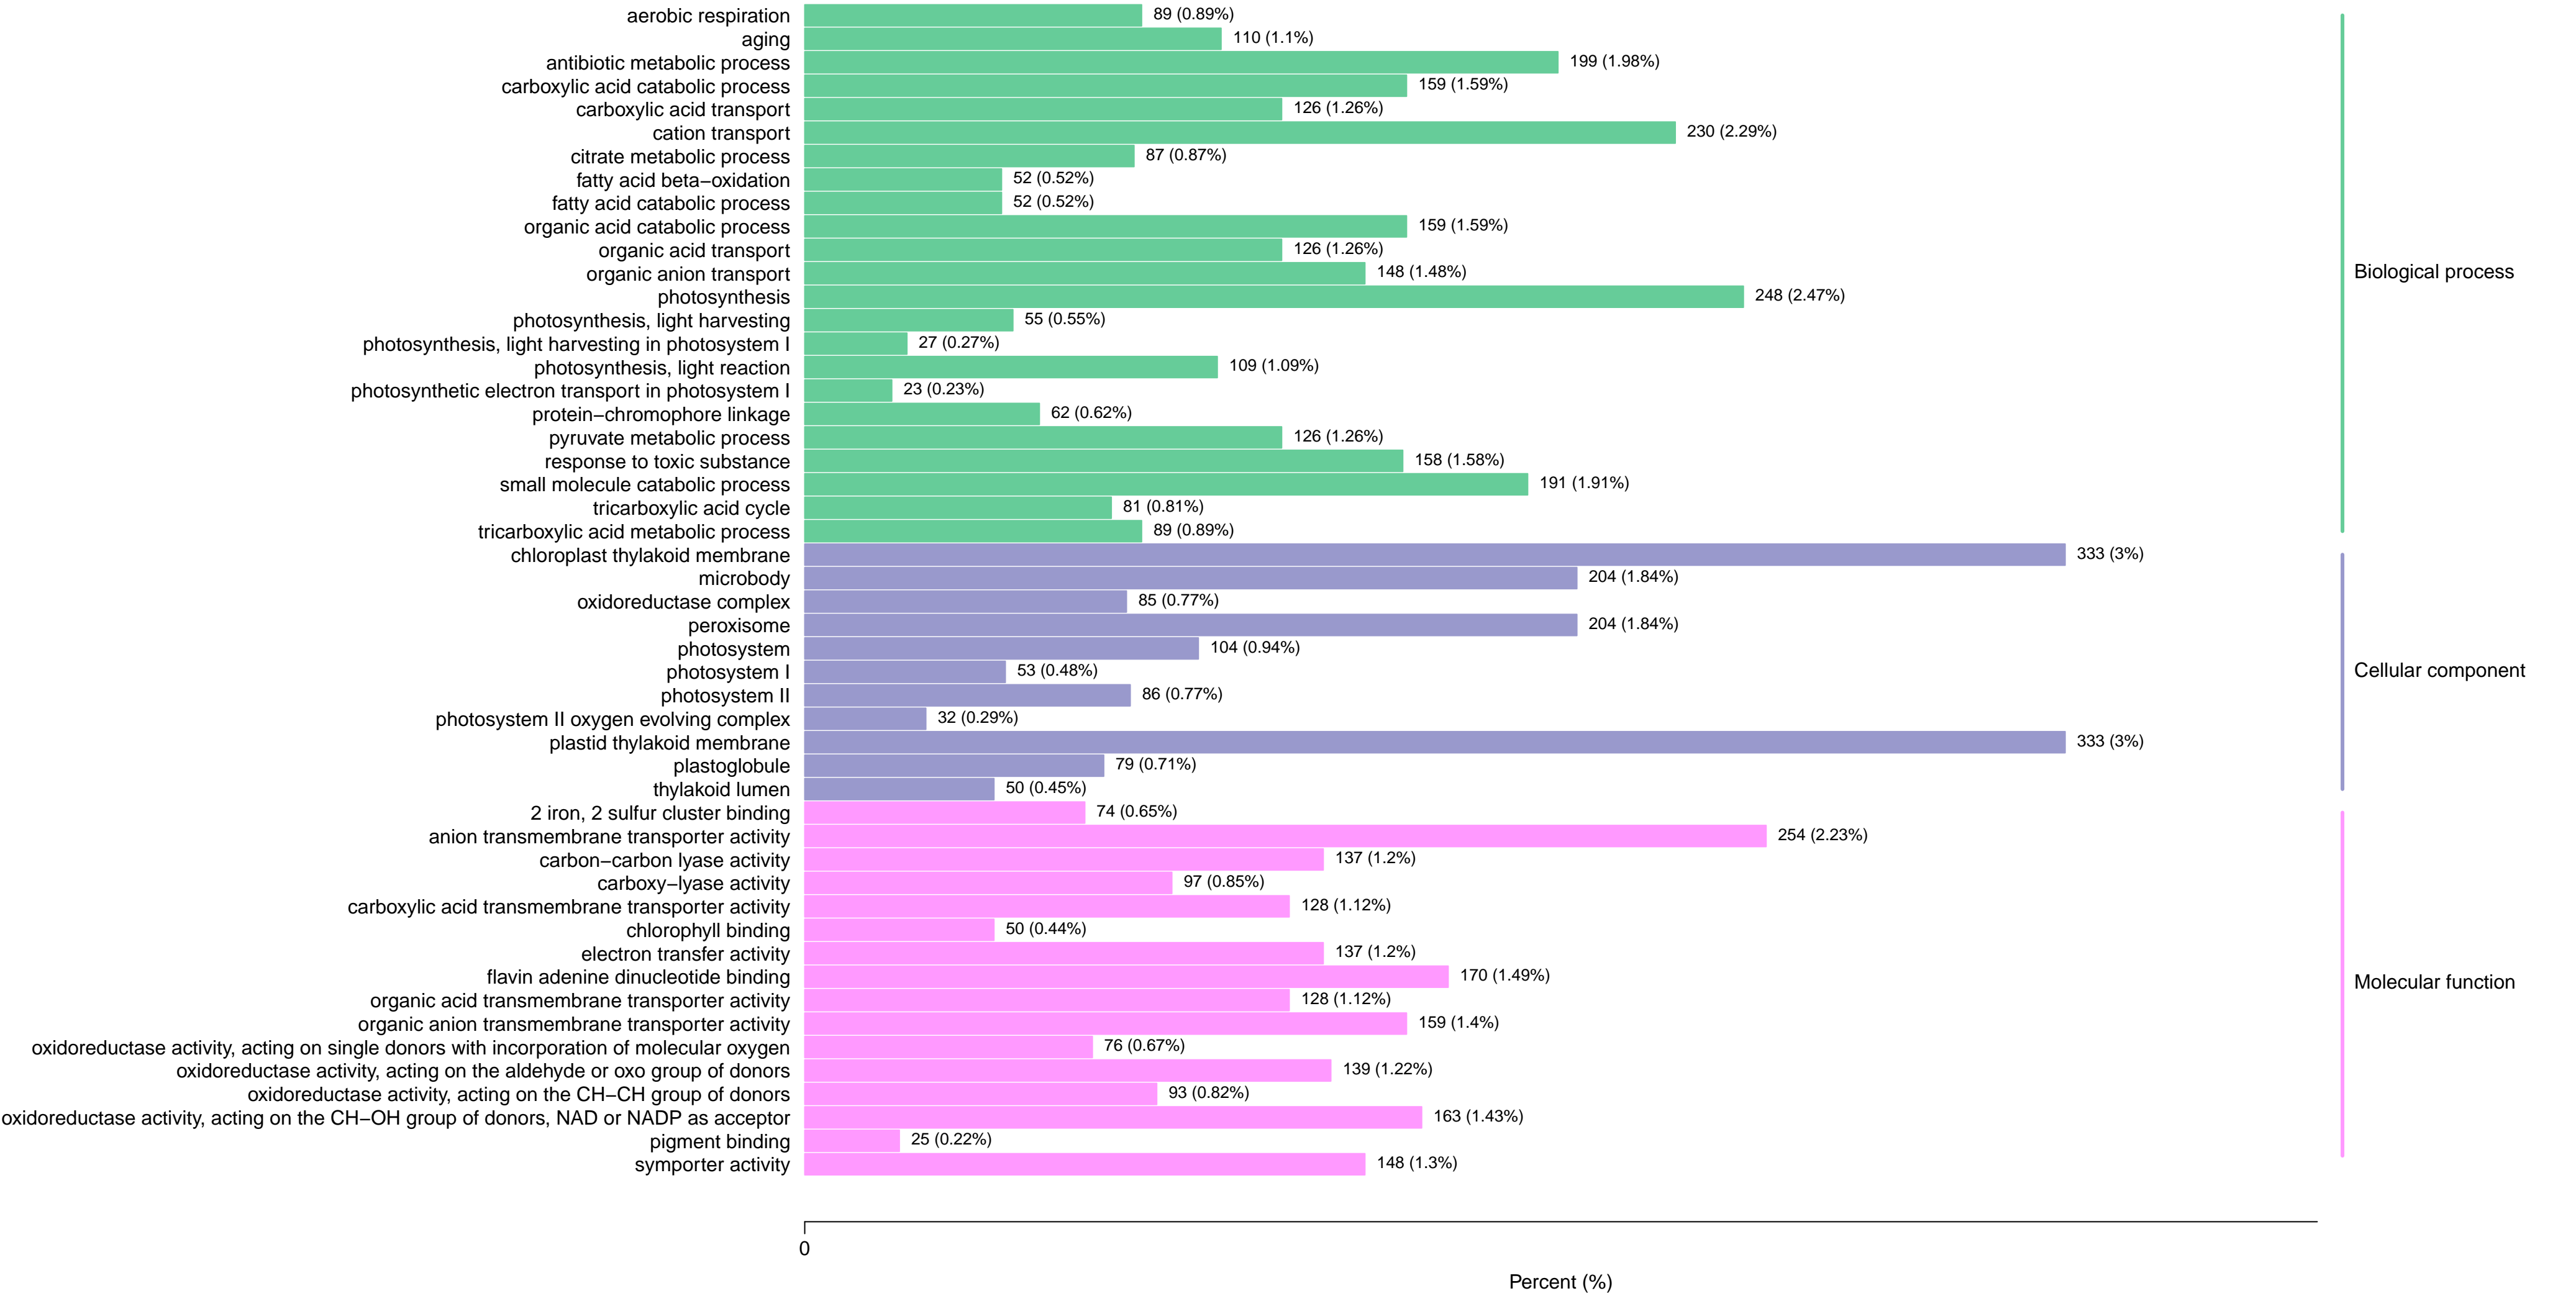

Supplement: s1 [file s1]

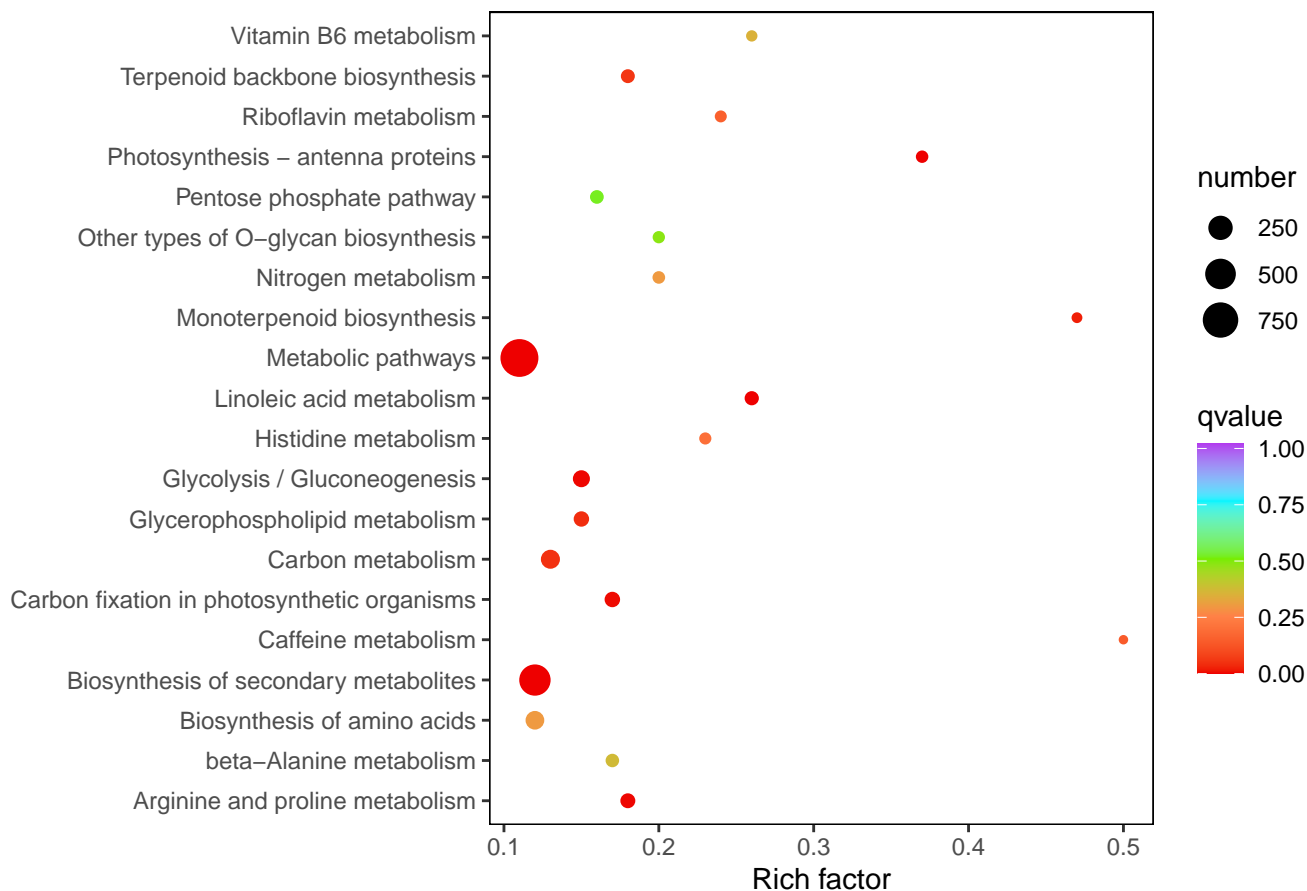

Supplement: s1 [file s1]

## Statistics of KEGG Enrichment

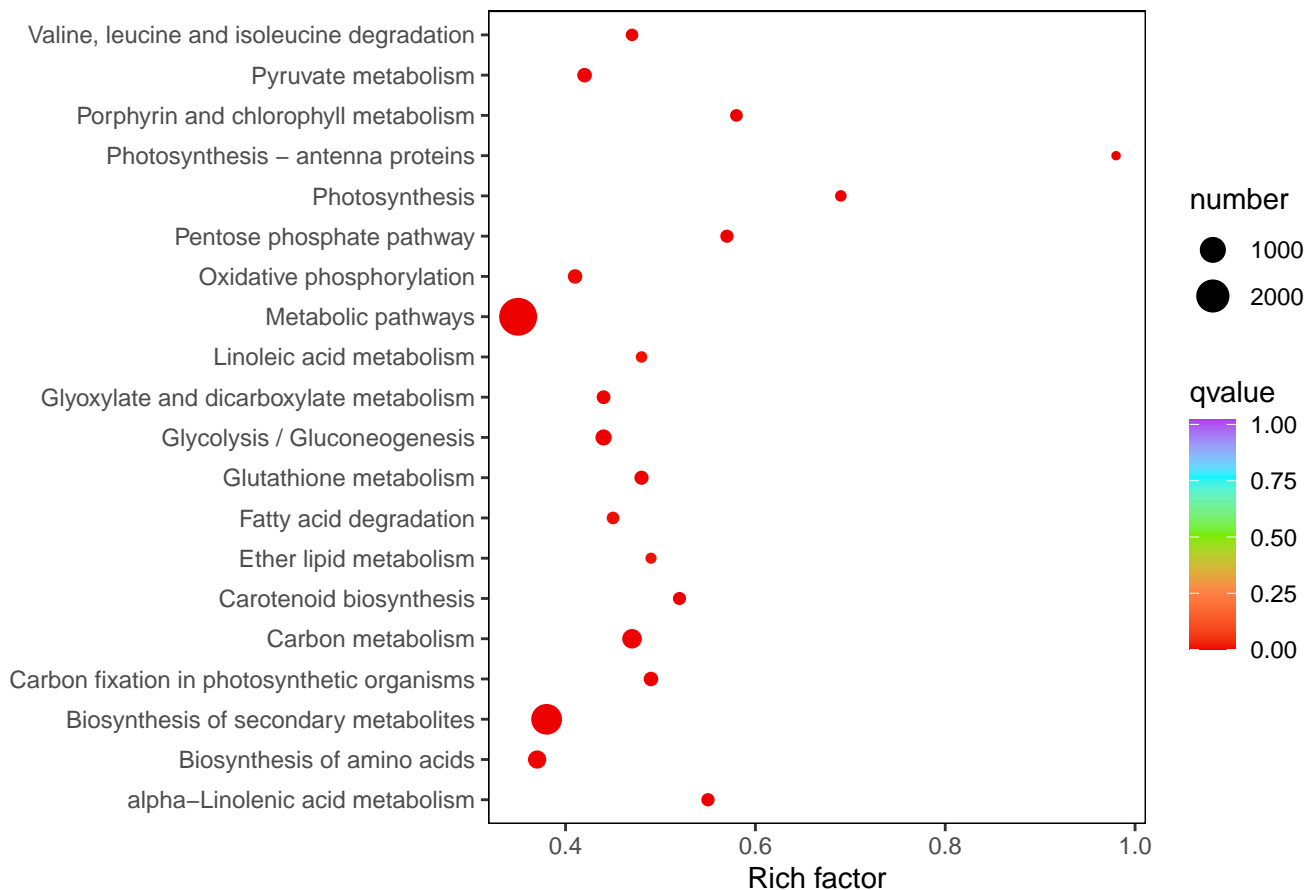

Supplement: s1 [file s1]

Supplementary figure S3

GO Enrichment top50

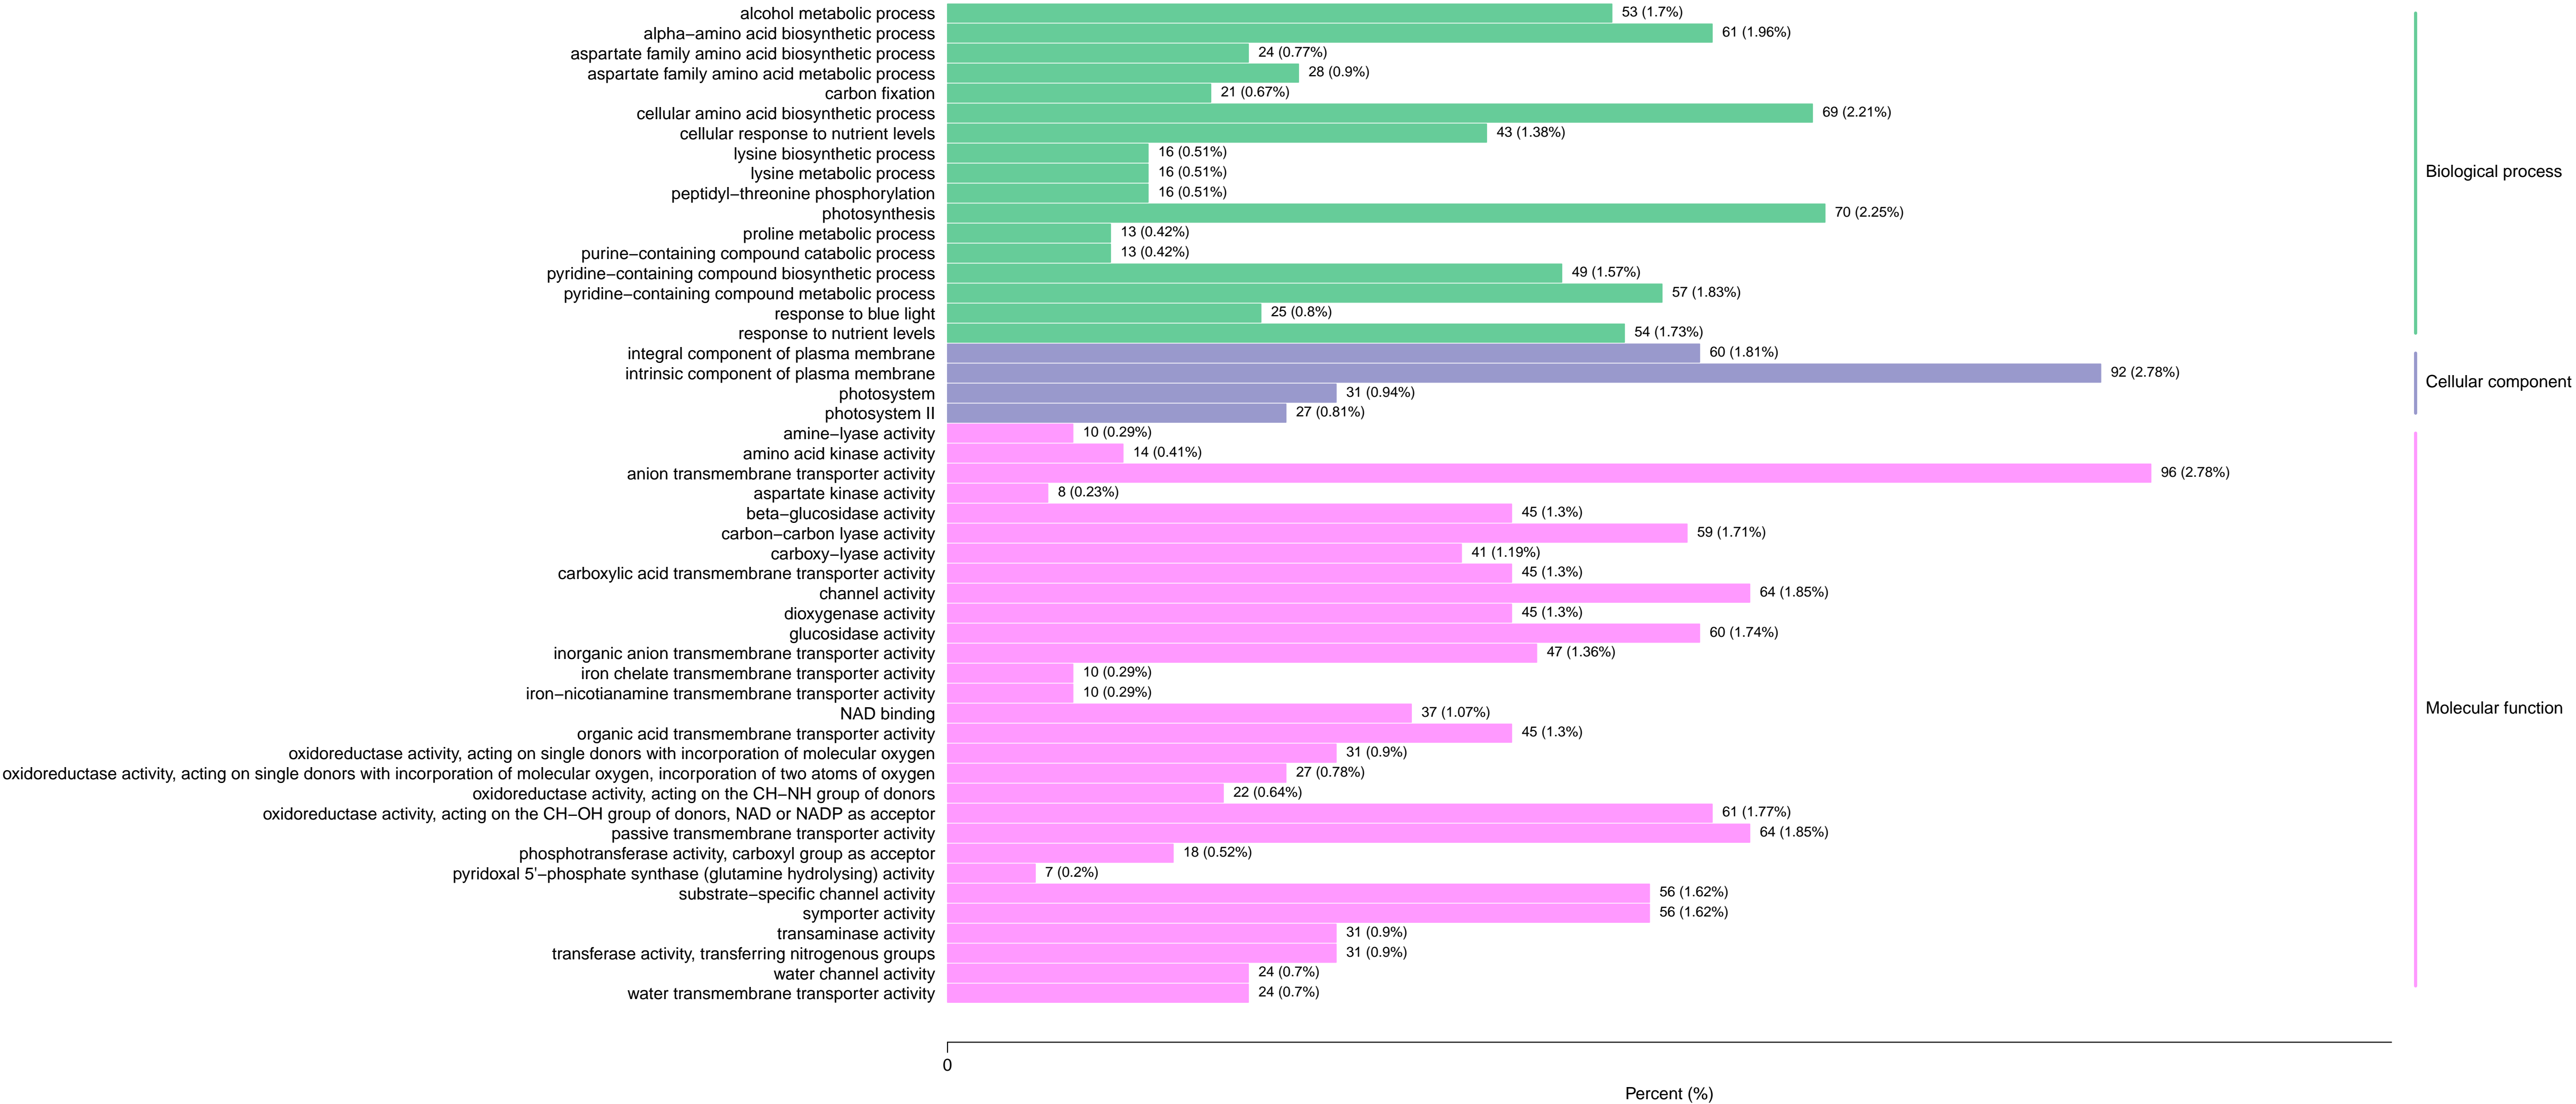

Supplement: s1 [file s1]
